# Supplementary material for: DNA stretching in the nucleosome facilitates alkylation by an intercalating antitumour agent
Source: PubMed Central journal article supplement — Nucleic Acids Res. 2009 Dec 21;38(6):2081–8. doi: 10.1093/nar/gkp1174 (PMC2847236; doi:10.1093/nar/gkp1174), 2009-12-21
Supplement: gkp1174_1.pdf [file gkp1174_1.pdf]

**Davey, Wu, Dong, Surana, Davey: “DNA Stretching in the Nucleosome Facilitates Alkylation by an Intercalating Antitumour Agent”**

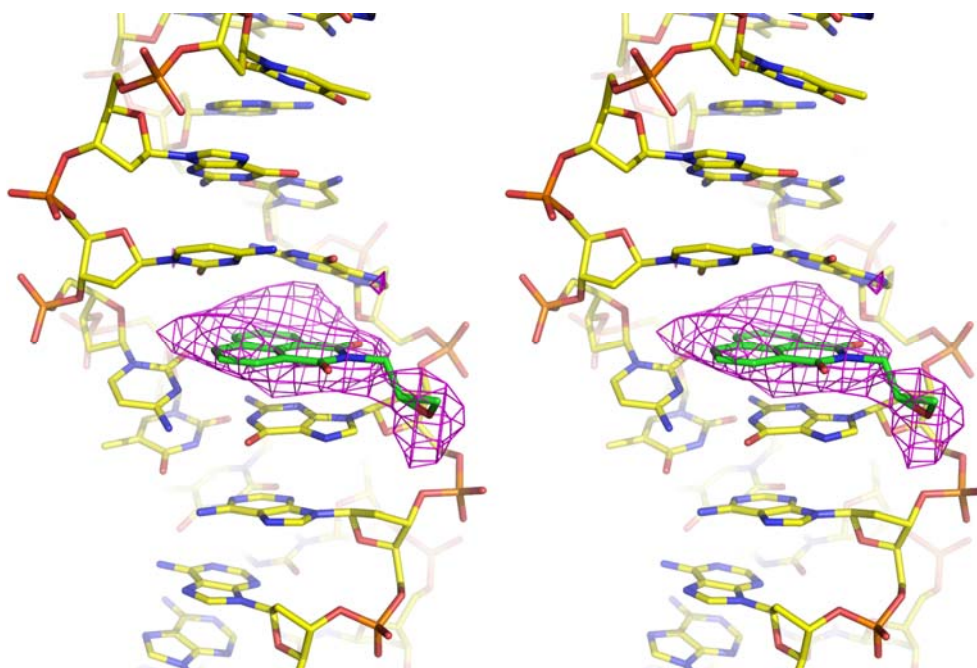

**Supplementary Figure 1.** Stereo image of the ENA-NCP145 model with superimposed omit electron density map. View corresponds to that of Fig. 2B (upper panel), described in the main text.
